# The American Journal of Psychiatry

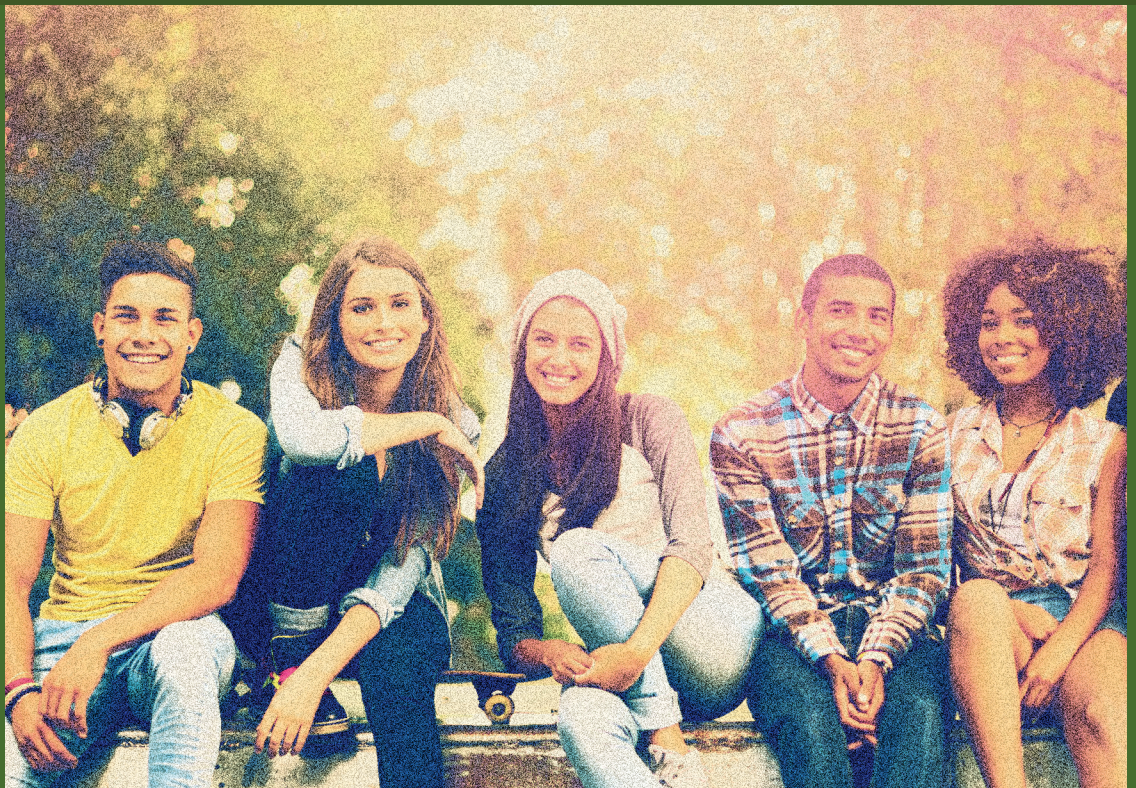

Comprehensive Versus Usual Community Care for First-Episode Psychosis:  
2-Year Outcomes From the NIMH RAISE Early Treatment Program

Identification of Distinct Psychosis Biotypes Using Brain-Based Biomarkers

A Case of Attenuated Psychosis Syndrome: A Broad Differential Diagnosis  
Requires Broad-Spectrum Treatment

Trauma and Depression in Ethiopian Women Returning  
from Middle Eastern Countries
