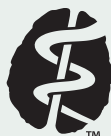

# The American Journal of Psychiatry

Official Journal of the American Psychiatric Association

## Officers 2015–2016

### President

Renée L. Binder, M.D.

### President-Elect

Maria A. Oquendo, M.D.

### Treasurer

Frank W. Brown, M.D.

### Secretary

Altha J. Stewart, M.D.

### Assembly

#### Speaker

Glenn A. Martin, M.D.

#### Speaker-Elect

Daniel J. Anzia, M.D.

#### Recorder

Theresa Miskimen, M.D.

### Office of the CEO and Medical Director

#### CEO and Medical Director

Saul Levin, M.D., M.P.A.

### Board of Trustees

Jeffrey Akaka, M.D.

Lama Bazzi, M.D.

R. Scott Benson, M.D.

Ronald M. Burd, M.D.

Stella Cai, M.D.

Brian Crowley, M.D.

Anita S. Everett, M.D.

Jeffrey L. Geller, M.D., M.P.H.

Dilip V. Jeste, M.D.

Jeffrey A. Lieberman, M.D.

Vivian B. Pender, M.D.

Gail E. Robinson, M.D.

Ravi N. Shah, M.D.

Paul Summergrad, M.D.

Melinda Young, M.D.

## Editorial Board

### Editor

Robert Freedman, M.D.

### Deputy Editors

David A. Lewis, M.D.

Robert Michels, M.D.

Daniel S. Pine, M.D.

A. John Rush, M.D.

Susan K. Schultz, M.D.

Carol A. Tamminga, M.D.

### Associate Editors

Alan Brown, M.D., M.P.H.

Tyrone Cannon, Ph.D.

Benjamin G. Druss, M.D., M.P.H.

Graham J. Emslie, M.D.

Daniel C. Javitt, M.D.

Bankole Johnson, M.D.

Ellen Leibenluft, M.D.

Joan L. Luby, M.D.

Constantine G. Lyketsos, M.D., M.H.S.

Helen S. Mayberg, M.D., F.R.C.P.C.

Barbara Milrod, M.D.

Terrie E. Moffitt, Ph.D.

Anita Thapar, M.B.B.Ch., F.R.C.Psych.,

Ph.D., F.Med.Sci.

Mauricio Tohen, M.D., Dr.PH., M.B.A.

Eduard Vieta, M.D., Ph.D.

Katherine L. Wisner, M.D., M.S.

Xin Yu, M.D.

### Editor Emerita

Nancy C. Andreasen, M.D., Ph.D.

### Former Editors

Amariah Brigham, M.D., 1844–1849

T. Romeyn Beck, M.D., 1849–1854

John P. Gray, M.D., 1854–1886

G. Alder Blumer, M.D., 1886–1894

Richard Dewey, M.D., 1894–1897

Henry M. Hurd, M.D., 1897–1904

Edward N. Brush, M.D., 1904–1931

Clarence B. Farrar, M.D., 1931–1965

Francis J. Braceland, M.D., 1965–1978

John C. Nemiah, M.D., 1978–1993

### Editorial Staff

#### Executive Editor

Michael D. Roy

#### Senior Editors

John J. Guardiano, Ph.D.

Jane Weaver

#### Production Manager

Susan Westrate

#### Assistant Editor

Angela Moore

#### Online Content Manager

Michael Pogachar

#### Editorial Support Services Manager

Heidi Koch

#### Editorial Assistant

Linda LaCour

#### Editorial Assistant/ Permissions Coordinator

Elizabeth Stern

#### Assistants to the Editors

Lois Lilienthal

Laura English

Rachel Hogg

Russell A. Scholl

### Publisher

Rebecca D. Rinehart

# The Residents' JOURNAL

## The American Journal of Psychiatry Residents' Journal

March 2016

Volume 11

Issue 3

Inside

- 2 Humanities More Important Than Ever in the Era of Scientific Psychiatry**  
Vivek Datta, M.D., M.P.H.  
*Discussing humanities as a tool for better understanding patients' experiences.*
- 3 Using Patient Writings in Psychotherapy: Review of Evidence for Expressive Writing and Cognitive-Behavioral Writing Therapy**  
Phaedra Elizabeth Pascoe, M.D.  
*Examining the evidence for expressive writing and cognitive-behavioral writing therapy, including theoretical background and subsequent research.*
- 7 An Introduction to the Buddhist Underpinnings of Mindfulness-Based Interventions: Buddha-Nature and Intrinsic Goodness**  
David Saunders, M.D., Ph.D.  
*Analyzing the role of Buddha-nature in mindfulness-based stress reduction.*
- 10 Mental Disorders and Naturalism**  
Awais Altaf, M.D.  
*Exploring the question of whether the diagnosis of mental disorder is a matter of natural facts or social norms.*
- 13 Diagnosis and the Structure of Scientific Revolutions**  
Jacob William McBride, D.O.  
*Commentary on paradigms in scientific fields: how they evolve and ultimately resolve the crisis they pose.*
- 15 I Am Not Sick, I Don't Need Help! How to Help Someone with Mental Illness Accept Treatment**  
M.M. Naveen, M.D.  
*Review of the book by Xavier Amador, Ph.D., describing lack of insight as a chronic symptom of mental illness rather than denial of it.*
- 16 Call for Applications to Join the 2016 Editorial Board**
- 17 Residents' Resources**

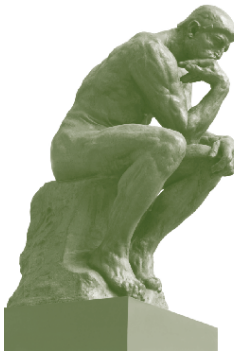

**Editor-in-Chief**  
Rajiv Radhakrishnan, M.B.B.S., M.D.

**Senior Deputy Editor**  
Katherine Pier, M.D.

**Deputy Editor**  
Hun Millard, M.D., M.A.

**Guest Editor**  
Vivek Datta, M.D., M.P.H.

**Associate Editors**  
Rafik Sidaros, M.B.B.Ch.  
Janet Charoensook, M.D.

**Staff Editor**  
Angela Moore

**Editors Emeriti**  
Sarah B. Johnson, M.D.  
Molly McVoy, M.D.  
Joseph M. Cerimele, M.D.  
Sarah M. Fayad, M.D.  
Monifa Seawell, M.D.  
Arshya Vahabzadeh, M.D.  
Misty Richards, M.D., M.S.

**Editor-in-Chief**  
Rajiv Radhakrishnan, M.B.B.S., M.D.

**Senior Deputy Editor**  
Katherine Pier, M.D.

**Deputy Editor**  
Hun Millard, M.D., M.A.

**Associate Editors**  
Rafik Sidaros, M.B.B.Ch.  
Janet Charoensook, M.D.

*The Residents' Journal*, the largest and most robust resident-led journal in the house of medicine, is an e-publication that serves as a forum to share your ideas and experiences in training, clinical practice, research, and careers with your colleagues.

To submit a manuscript, please visit [mc.manuscriptcentral.com/appi-ajp](http://mc.manuscriptcentral.com/appi-ajp) and select a manuscript type for AJP Residents' Journal. You may submit a commentary (500 words), book review (500 words), history of psychiatry (500 words), clinical case conference (1,250 words), review article (1,500 words), treatment in psychiatry article (1,500 words), research article (1,250 words), drug review (1,500 words), or letter to the editor (250 words).

*The Residents' Journal* is sent free-of-charge to all psychiatry residents. Anyone interested in being included on the distribution list should contact Angela Moore, *The Residents' Journal* staff editor at [ajp@psych.org](mailto:ajp@psych.org) with "Subscribe to Residents' Journal" in the subject line.

To access the complete Residents' Journal archives, visit [ajp.psychiatryonline.org/residents\\_journal](http://ajp.psychiatryonline.org/residents_journal)

# There's So Much More to AJP Than Meets the Page!

Visit *The American Journal of Psychiatry's* website on PsychiatryOnline for the following features!

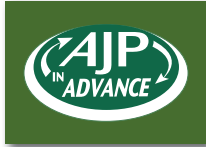

## AJP in Advance

The very latest research advances!

At **AJP in Advance**, you can discover the following before their appearance in print:

### **Perinatal Phosphatidylcholine Supplementation and Early Childhood Behavior Problems: Evidence for *CHRNA7* Moderation**

Children of mothers who took phosphatidylcholine during pregnancy had fewer attention problems and social withdrawal at 40 months of age than children of mothers who took placebo. The children's behavior was moderated by *CHRNA7* variants associated with later mental illness and was related to previously reported enhanced cerebral inhibition in infancy.

### **Ultra-Low-Dose Buprenorphine as a Time-Limited Treatment for Severe Suicidal Ideation: A Randomized Controlled Trial**

Short-term, low-dose sublingual buprenorphine had greater efficacy than placebo in reducing suicidal ideation among severely suicidal patients without substance abuse. Antidepressant use and a borderline personality disorder diagnosis did not affect the results.

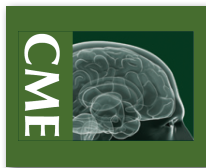

## AJP CME

Three articles in this issue form the basis of a short course with questions that can be answered for up to 1 *AMA PRA Category 1 Credit™* each by visiting <http://psychiatryonline.org/cme> and clicking on the "**American Journal of Psychiatry**" tab. CME credit is issued only **online**, and a paid subscription to AJP CME course program is required. This month's courses appear on pages 437–440.

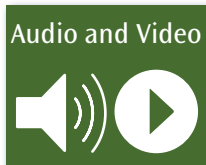

Audio and Video

## Have You Heard?

With AJP Audio you can listen to highlights of this issue. This month, Deputy Editor Susan K. Schultz, M.D., discusses lurasidone for major depression with mixed features, bitemporal ECT compared with high-dose unilateral ECT given twice a week, neurocircuitry of depression with increased versus decreased appetite, attenuated psychosis syndrome, identification of distinct psychosis biotypes, and comprehensive community care for first-episode psychosis.

Also, visit the online edition of this month's *Journal* to view a video of Deputy Editor Daniel S. Pine, M.D., presenting highlights from the issue.

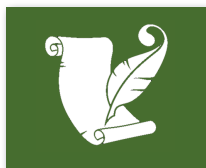

## Revisit the field's rich history!

### **150 years ago this month: "The Labor Question, and Hospitals for Incurables"**

At a time when cost considerations commonly led the discharge of incurable patients from mental institutions to the "open air system," Dr. I. Ray examines the practicalities—or rather impracticalities—of underwriting the housing and care of this population with the patients' own labor.

### **25 years ago this month: "Origins of DSM-I: A Study in Appearance and Reality"**

Gerald N. Grob, Ph.D., a historian of mental health policy and medicine, "traces the history of psychiatric nosology in the United States from its origins in the early nineteenth century to the introduction of DSM-I in 1952. ... The author's basic argument is that nosology reflected not only psychiatric ideology but also other, external determinants at any given point in time."

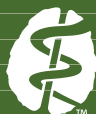

Source: https://psychiatryonline.org/doi/suppl/10.1176/ajp.2016.173.issue-4/suppl_file/front.pdf
